# Supplementary material for: A versatile building block for EDOT or PEDOT functionalization
Source: Royal Society of Chemistry journal article supplement (doi:10.1039/b715568a), 2008-01-01
Supplement: b715568a.pdf [file b715568a.pdf]

**Electronic Supplementary Information**

**A versatile building block for EDOT or PEDOT functionalization.**

Mirela Balog, Houari Rayah, Franck Le Derf \* and Marc Sallé \*

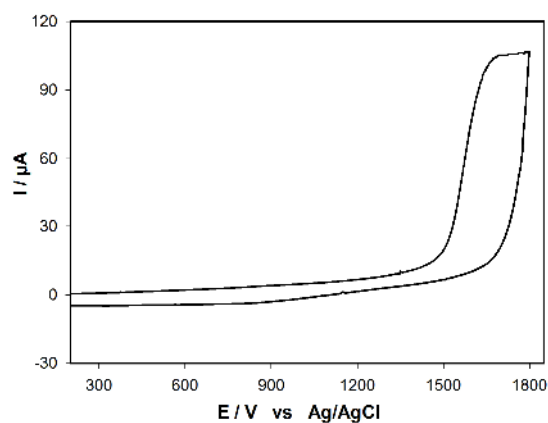

**Figure S1.** a) CV of **5**, , CH<sub>3</sub>CN 100 mVs<sup>-1</sup>; CH<sub>3</sub>CN, Bu<sub>4</sub>NPF<sub>6</sub> (0.1 M), Pt Φ =2 mm.

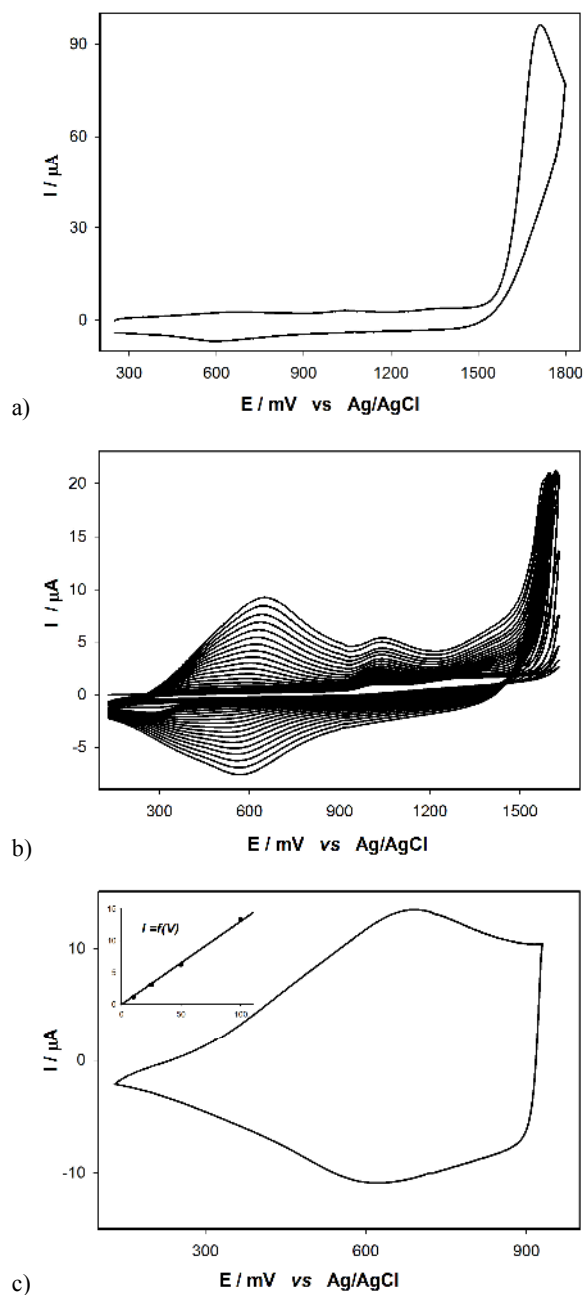

**Figure S2** a) CV of **7**; b) Electropolymerization of **7** (10 mM), in 0.10 M  $\text{Bu}_4\text{NPF}_6 / \text{CH}_3\text{CN}$ , 25 cycles at  $50 \text{ mV.s}^{-1}$ , Pt  $\Phi = 2 \text{ mm}$ ; c) CV response of poly(**7**); Insert: plot of the peak intensity as a function of the scan rate;  $\text{CH}_3\text{CN}$ ,  $\text{Bu}_4\text{NPF}_6$  (0.1 M),  $100 \text{ mVs}^{-1}$ , Pt  $\Phi = 2 \text{ mm}$ .

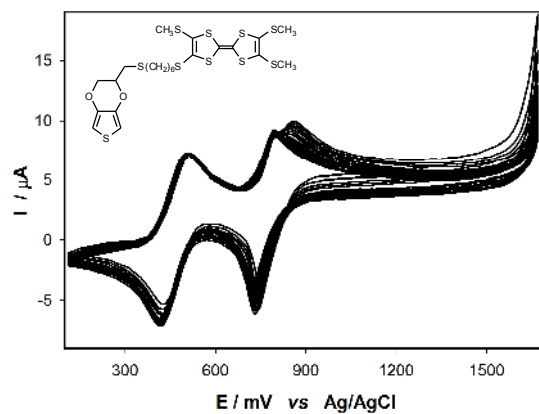

**Figure S3.** Electropolymerization of **8** (1mM), in 0.10M Bu<sub>4</sub>NPF<sub>6</sub> / CH<sub>3</sub>CN, 25 cycles at 50 mV.s<sup>-1</sup>, Pt Φ=2 mm.

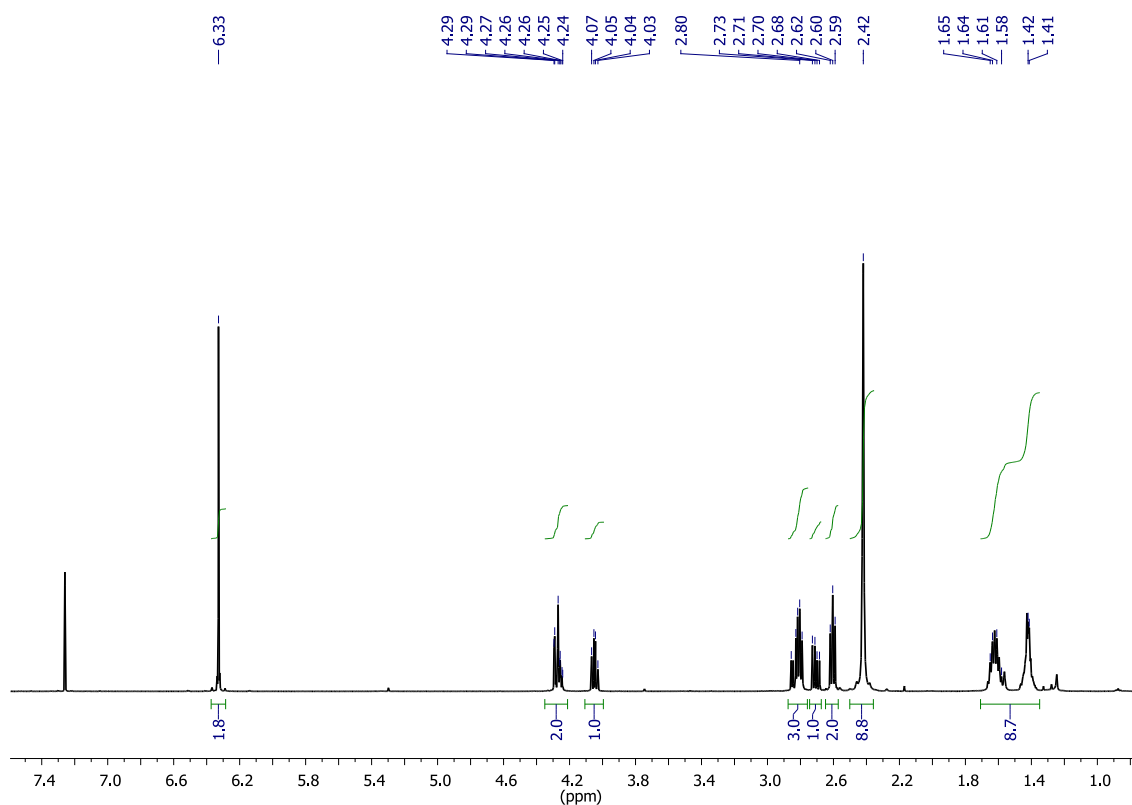

**Figure 1:** <sup>1</sup>H-NMR of compound **8** (CDCl<sub>3</sub>)

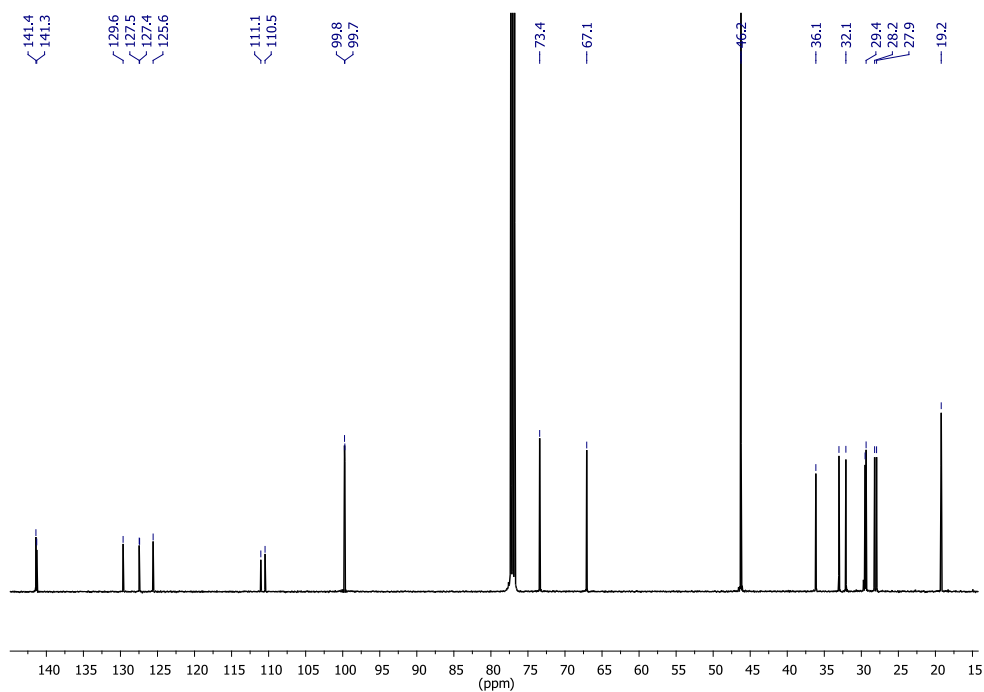

**Figure 2** <sup>13</sup>C-NMR of compound **8** (CDCl<sub>3</sub>)
